# Supplementary material
Source: PubMed Central journal article supplement (PMC1400575)
Supplement: plntphys_pp.105.074864_1.pdf [file plntphys_pp.105.074864_1.pdf]

| Allele                          | Lab ref.                         | Predicted mutation             | Reference background                | Mutagen | Identification                             |
|---------------------------------|----------------------------------|--------------------------------|-------------------------------------|---------|--------------------------------------------|
| <i>ZTL-Cvi</i>                  | -                                | P035T                          | Col-0, <i>Ler</i> , <i>Ws</i> , C24 | -       | Somers et al., 2000                        |
| <i>ztl-1</i>                    | <i>toc7</i>                      | D425N                          | C24 <i>CAB:LUC</i>                  | EMS     | Millar et al., 1995<br>Somers et al., 2000 |
| <i>ztl-2</i>                    |                                  | D320N                          | C24 <i>CAB:LUC</i>                  | EMS     | Somers et al., 2000                        |
| <i>ztl-3</i><br>( <i>ado1</i> ) | SALK_035701                      | insertion after E440           | Col-0                               | T-DNA   | Jarillo et al., 2001                       |
| <i>ztl-21</i>                   | TC338                            | G119D                          | <i>Ws CAB:LUC+</i>                  | EMS     | Mapping                                    |
| <i>ztl-22</i>                   | D11                              | E203K                          | C24 <i>CAB:LUC</i>                  | EMS     | Mapping                                    |
| <i>ztl-23</i>                   | TC461                            | G287D                          | <i>Ws CAB:LUC+</i>                  | EMS     | Mapping                                    |
| <i>ztl-24</i>                   | TC490                            | P317S                          | <i>Ws CAB:LUC+</i>                  | EMS     | Mapping                                    |
| <i>ztl-25</i>                   | TC652                            | G347S                          | <i>Ws CAB:LUC+</i>                  | EMS     | Mapping                                    |
| <i>ztl-26</i>                   | TC634                            | D372N                          | <i>Ws CAB:LUC+</i>                  | EMS     | Sequence only                              |
| <i>ztl-27</i>                   | C1                               | G452D                          | C24 <i>CAB:LUC</i>                  | EMS     | Mapping                                    |
| <i>ztl-28</i>                   | TC415                            | G452S                          | <i>Ws CAB:LUC+</i>                  | EMS     | Sequence only                              |
| <i>ztl-29</i>                   | TC354                            | Q544STOP                       | <i>Ws CAB:LUC+</i>                  | EMS     | Sequence only                              |
| <i>ztl-30</i>                   | TC297                            | G564R                          | <i>Ws CAB:LUC+</i>                  | EMS     | Mapping                                    |
| <i>ztl-31</i>                   | D6                               | W594STOP                       | C24 <i>CAB:LUC</i>                  | EMS     | Mapping                                    |
| <i>TOC1</i>                     | -                                | Identical amino acid sequences | Col-0, <i>Ws</i> , C24              |         | our unpublished data                       |
| <i>toc1-1</i>                   | <i>toc26</i>                     | A562V                          | C24 <i>CAB:LUC</i>                  | EMS     | Millar et al., 1995                        |
| <i>toc1-2</i>                   |                                  | V45M, splice junction          | C24 <i>CAB:LUC</i>                  | EMS     | Strayer et al., 2000                       |
| <i>toc1-3</i>                   |                                  | A562V                          | <i>Ler gal-3</i>                    | EMS     | Blazquez et al., 2002                      |
| <i>toc1-4</i>                   | <i>short02</i><br><i>short30</i> | Q103STOP                       | Col <i>CAB:LUC</i>                  | EMS     | Hazen et al., 2005a                        |
| <i>toc1-5</i>                   | <i>short07</i> <i>short25</i>    | P124S                          | Col <i>CAB:LUC</i>                  | EMS     | Hazen et al., 2005a                        |
| <i>toc1-6</i>                   | <i>short26</i>                   | splice junction                | Col <i>CAB:LUC</i>                  | EMS     | Hazen et al., 2005a                        |
| <i>toc1-7</i>                   | <i>short36</i>                   | Q496STOP                       | Col <i>CAB:LUC</i>                  | EMS     | Hazen et al., 2005a                        |
| <i>toc1-8</i>                   | TC442                            | P96L                           | <i>Ws CAB:LUC+</i>                  | EMS     | Mapping                                    |

|                 |       |                                    |                                   |                          |                    |
|-----------------|-------|------------------------------------|-----------------------------------|--------------------------|--------------------|
| <i>toc1-9</i>   | TC522 | W138STOP                           | Ws <i>CAB:LUC+</i>                | EMS                      | Mapping            |
| <i>toc1-101</i> |       | 16bp deletion, frameshift, 189STOP | Col, activation tagged population | (activation tagged line) | Kikis et al., 2005 |

---

**Supplementary Table 1. Origin and sequence of all published *ZTL* and *TOC1* mutations.**

Allele numbers for *toc1* alleles of Hazen et al. 2005a were agreed with the originating laboratory (Sam Hazen, personal communication).

Lab ref., line reference from originating laboratory.

Predicted mutation, amino acid code and position of substitution or STOP codon.

C24 *CAB:LUC*, parent transgenic line 2BΩ2CA/C, NASC stock number N3756.

Ws *CAB:LUC+*, parent transgenic line 6a, NASC stock number N9352.

Identification, identification method for new alleles or citation of first description.

Mapping, for *ZTL* complete linkage to marker MSF19-RsaI (TAIR accession

GeneticMarker:4292063) and tight linkage to LFY3 (TAIR accession

GeneticMarker:1945613) within phenotyping error (or *vice versa* for *TOC1*), followed by sequencing of *ZTL* or *TOC1* from at least three independent homozygous plants.

| Genotype        | Period in red light (h) | ± SEM | n  | Period in blue light (h) | ± SEM | n  | Period in red + blue light (h) |
|-----------------|-------------------------|-------|----|--------------------------|-------|----|--------------------------------|
| <b>C24 (WT)</b> | 29.5                    | 0.33  | 34 | 25.9                     | 0.26  | 24 | 26.1                           |
| <i>ztl-1</i>    | 35.3                    | 0.79  | 22 | 32.5                     | 0.48  | 18 | 33.0                           |
| <i>ztl-22</i>   | 34.5                    | 0.70  | 24 | 31.4                     | 0.57  | 24 | 31.4                           |
| <i>ztl-27</i>   | 34.1                    | 0.75  | 21 | 32.5                     | 0.29  | 35 | 32.1                           |
| <i>ztl-31</i>   | 36.4                    | 0.81  | 18 | 32.7                     | 0.61  | 20 | 34.3                           |
| <b>Ws (WT)</b>  | 27.3                    | 0.21  | 77 | 24.7                     | 0.09  | 39 | 26.3                           |
| <i>ztl-21</i>   | 29.4                    | 0.21  | 39 | 27.9                     | 0.23  | 60 | 28.7                           |
| <i>ztl-23</i>   | 33.7                    | 0.66  | 29 | 29.9                     | 0.35  | 42 | 31.5                           |
| <i>ztl-24</i>   | 32.1                    | 0.64  | 23 | 28.2                     | 0.65  | 19 | 30.8                           |
| <i>ztl-25</i>   | 35.0                    | 0.54  | 21 | 31.2                     | 0.29  | 26 | 33.6                           |
| <i>ztl-26</i>   | 32.1                    | 0.61  | 24 | 28.4                     | 0.43  | 18 | 32.5                           |
| <i>ztl-28</i>   | 32.9                    | 0.43  | 29 | 28.5                     | 0.27  | 28 | 30.3                           |
| <i>ztl-29</i>   | 32.3                    | 0.49  | 22 | 27.7                     | 0.31  | 28 | 30.0                           |
| <i>ztl-30</i>   | 32.7                    | 0.48  | 20 | 28.4                     | 0.41  | 23 | 31.5                           |

**Supplementary Table 2. Comparison of period lengths for all new *ztl* alleles.**

The circadian period of rhythmic *CAB2:LUC(+)* luminescence was measured as described in Figure 4B, under constant red light ( $\sim 5 \mu\text{mol}\cdot\text{m}^{-2}\cdot\text{s}^{-1}$ ) or blue light ( $\sim 8 \mu\text{mol}\cdot\text{m}^{-2}\cdot\text{s}^{-1}$ ) or red and blue light ( $\sim 5 \mu\text{mol}\cdot\text{m}^{-2}\cdot\text{s}^{-1}$  each). The new alleles are listed after the cognate parent.
